# Supplementary material for: Human Infections with Borna Disease Virus 1 (BoDV-1) Primarily Lead to Severe Encephalitis: Further Evidence from the Seroepidemiological BoSOT Study in an Endemic Region in Southern Germany
Source: MDPI journal article supplement (doi:10.3390/v15010188), 2023-01-09
Supplement: s1 [file s1]

**Table S1:** Questionnaire with epidemiological risk factors

|                                                           | healthy blood donors (n = 216)                                                          | outpatients after solid-organ transplantation (n = 280)                                   |
|-----------------------------------------------------------|-----------------------------------------------------------------------------------------|-------------------------------------------------------------------------------------------|
| residence                                                 | city/town: 141 (65%)<br>countryside: 67 (31%)<br>ambiguous answer: 4 (2%)<br>NA: 4 (2%) | city/town: 88 (31%)<br>countryside: 186 (66%)<br>ambiguous answer: 1 (< 1%)<br>NA: 4 (2%) |
| residence in village < 10.000 inhabitants                 | no: 160 (74%)<br>yes: 52 (24%)<br>NA: 4 (2%)                                            | no: 93 (33%)<br>yes: 177 (63%)<br>ambiguous answer: 1 (< 1%)<br>NA: 9 (3%)                |
| property with direct access to fields, meadows or forests | no: 117 (54%)<br>yes: 94 (44%)<br>NA: 5 (2%)                                            | no: 91 (33%)<br>yes: 185 (66%)<br>ambiguous answer: 2 (< 1%)<br>NA: 2 (< 1%)              |
| practicing gardening                                      | no: 114 (53%)<br>yes: 95 (44%)<br>ambiguous answer: 1 (< 1%)<br>NA: 4 (2%)              | no: 98 (35%)<br>Yes: 178 (64%)<br>ambiguous answer: 1 (< 1%)<br>NA: 3 (1%)                |
| garden with stone wall                                    | no: 149 (69%)<br>yes: 61 (28%)<br>NA: 6 (3%)                                            | no: 174 (62%)<br>yes: 92 (33%)<br>NA: 14 (5%)                                             |
| animal contact                                            | no: 96 (44%)<br>yes: 113 (52%)<br>NA: 5 (2%)                                            | no: 132 (47%)<br>yes: 145 (52%)<br>NA: 2 (< 1%)                                           |
| contact to cats                                           | yes: 66 (31%)                                                                           | yes: 61 (22%)                                                                             |
| contact to shrews                                         | no: 179 (83%)<br>yes: 32 (15%)<br>NA: 4 (2%)                                            | no: 210 (75%)<br>yes: 61 (22%)<br>NA: 9 (3%)                                              |
| walking barefoot outdoors                                 | no: 148 (69%)<br>yes: 63 (29%)<br>NA: 4 (2%)                                            | no: 195 (70%)<br>yes: 80 (29%)<br>NA: 5 (2%)                                              |

**Table S2:** Contingency analysis of clinical signs (questionnaire) and reactive ELISA screening (reactivity against  $\geq 1$  antigen)

| new onset/aggravation of      | healthy blood donors                      | outpatients after solid-organ transplantation |
|-------------------------------|-------------------------------------------|-----------------------------------------------|
| headache                      | OR not defined/not calculated<br>p = 1.00 | OR: 2.18<br>95% CI: 0.79-5.91<br>p = 0.09     |
| short-time memory impairment  | OR: 1.67<br>95% CI: 0.16-9.36<br>p = 0.63 | OR: 0.75<br>95% CI: 0.20-2.30<br>p = 0.80     |
| long-time memory impairment   | OR not defined/not calculated<br>p = 1.00 | OR: 1.59<br>95% CI: 0.57-4.22<br>p = 0.34     |
| visual impairment             | OR not defined/not calculated<br>p = 0.36 | OR: 1.54<br>95% CI: 0.76-3.09<br>p = 0.23     |
| smelling/tasting impairment   | OR not defined/not calculated<br>p = 1.00 | OR: 1.47<br>95% CI: 0.42-4.81<br>p = 0.57     |
| behavioral/personality change | OR not defined/not calculated<br>p = 1.00 | OR: 2.15<br>95% CI: 0.39-11.83<br>p = 0.28    |
| frequent falls                | not defined/not calculated                | OR: 1.31<br>95% CI: 0.27-5.32<br>p = 0.74     |
| gait ataxia                   | OR not defined/not calculated<br>p = 1.00 | OR: 0.76<br>95% CI: 0.21-2.34<br>p = 0.80     |
| numbness of extremities       | OR not defined/not calculated<br>p = 1.00 | OR: 1.44<br>95% CI: 0.62-3.24<br>p = 0.33     |
| unable to walk long distance  | OR not defined/not calculated<br>p = 0.15 | OR: 1.09<br>95% CI: 0.52-2.20<br>p = 0.86     |
| paresis                       | OR not defined/not calculated<br>p = 1.00 | OR: 1.43<br>95% CI: 0.66-3.03<br>p = 0.35     |

statistical analysis with Fisher's exact test

(OR = odds ratio, 95% CI = 95% confidence interval of OR)

**Table S3:** Peptides specific for patients with BoDV-1 infection

| protein | peptide position on membrane | amino acids of protein | peptide sequence                    | no. of positive samples | homology, human proteins (taxid: 9606)        | E value |
|---------|------------------------------|------------------------|-------------------------------------|-------------------------|-----------------------------------------------|---------|
| N       | 2-4                          | 5-27                   | RRLVDDADAMEDQDLYEPPASLP             | 4                       | leptin receptor overlapping transcript like 1 | 0.058   |
| N       | 23-28                        | 89-123                 | AFVHGGVPRESYLSTPVTRGEQTVVKTAIFYGEKT | 3                       | leucine rich repeat containing 5 variant      | 5.7     |
| N       | 43-45                        | 169-191                | MMAALNRPSHGETATLLQMFNPH             | 2                       | endogenous Bornavirus like nucleoprotein 2    | 0.084   |
| N       | 57-58                        | 225-239                | QIKLVASYAQMTTYTTIKE                 | 1                       | endogenous Bornavirus like nucleoprotein 1    | 0.13    |
| N       | 65                           | 257-271                | VVAYEIRDELEVS AK                    | 1                       | ribosomal protein S6 kinase alpha-5           | 4.6     |
| N       | 77-78                        | 305-319                | AAFYWSKKENPTMAGYRAS                 | 2                       | olfactory receptor 4B1                        | 3.0     |
| N       | 89                           | 353-367                | LSGEISAIMKMIGVT                     | 1                       | fibrous sheath-interacting protein 2          | 9.3     |
| X       | 2-3                          | 5-23                   | LRLTLLELVRRLLNGNATIE                | 3                       | immunoglobulin heavy chain junction region    | 7.8     |
| P       | 6-8                          | 21-43                  | LRRERP GSPRPRKVPRNALTQPV            | 4                       | Ras association domain family member 5        | 0.06    |
|         |                              |                        |                                     |                         | PDCD7 protein                                 | 0.17    |
|         |                              |                        |                                     |                         | DNA-binding protein A                         | 0.33    |
|         |                              |                        |                                     |                         | HYA22                                         | 0.47    |
|         |                              |                        |                                     |                         | zinc finger protein 335                       | 0.93    |
| P       | 18                           | 69-83                  | LSNDELIKKLVTELA                     | 2                       | zinc finger protein 469                       | 0.009   |
| P       | 39                           | 153-167                | KLMMEKVDLLYASTA                     | 2                       | hCG2036668                                    | 9.2     |
| P       | 42                           | 165-179                | STAVGTSAPMLPSHP                     | 2                       | mediator complex subunit 13L                  | 9.3     |
| P       | 44                           | 173-187                | PMLPSHPAPPRIYPQ                     | 2                       | alternative protein KLC2                      | 0.4     |
| P       | 46                           | 181-195                | PPRIYPQLPSAPTTD                     | 3                       | immunoglobulin heavy chain junction region    | 2.8     |

Peptides that were found to be specific for samples of patients with BoDV-1 infection in a linear epitope mapping were blasted against a human protein database (<https://blast.ncbi.nlm.nih.gov>). All results with E values < 1 are given. For peptides with insignificant alignments (E value > 1), the lowest E value is shown.

**Table S4:** Peptides associated with false-reactive ELISA results

| protein | peptide position on membrane | amino acids of protein | peptide sequence        | cohort                                 | no. of positive samples | homology, human proteins (taxid: 9606)                                    | E value | homology, organism-independent, exclusion of <i>Bornaviridae</i> (taxid: 178830)                                                                        | E value            |
|---------|------------------------------|------------------------|-------------------------|----------------------------------------|-------------------------|---------------------------------------------------------------------------|---------|---------------------------------------------------------------------------------------------------------------------------------------------------------|--------------------|
| N       | 5-6                          | 17-35                  | QDLYEPPASLPKLPKGFLQ     | blood donor (BoDV-1)                   | 1 (4)                   | 4-hydroxy-phenylpyruvate-dioxygenase                                      | 2.1     | CehA/McbA family metallohydrolase [Deltaproteobacteria bacterium]                                                                                       | 8.8                |
| N       | 12-13                        | 45-63                  | PGIGHEKDIRQNAVALLDQ     | transplant                             | 1                       | G protein subunit beta 2                                                  | 1.5     | endogenous Bornavirus-like nucleoprotein 2 [Ictidomys tridecemlineatus]                                                                                 | 0.78               |
| N       | 32                           | 125-139                | QRDLTELEISSIFSH         | transplant                             | 1                       | calcium/calmodulin-dependent 3',5'-cyclic nucleotide phosphodiesterase 1C | 9.2     | pseudouridine synthase [unclassified Clostridium]<br><br>endogenous Bornavirus-like nucleoprotein 2 [Ictidomys tridecemlineatus]                        | 0.14<br><br>0.56   |
| N       | 36-38                        | 141-163                | CSLLIGVVIGSSSKIKAGAEQIK | transplant<br>blood donor NEG (BoDV-1) | 3<br>2 (2)              | endogenous Bornavirus like nucleoprotein 2                                | 0.65    | endogenous Bornavirus-like nucleoprotein 2 [Ictidomys tridecemlineatus]<br><br>endogenous Bornavirus-like nucleoprotein 1-like [Chrysochloris asiatica] | 2E-09<br><br>3E-07 |

|   |       |         |                                                                                |                                                          |                  |                                                     |       |                                                                                                                                                                                                                                                                         |                        |
|---|-------|---------|--------------------------------------------------------------------------------|----------------------------------------------------------|------------------|-----------------------------------------------------|-------|-------------------------------------------------------------------------------------------------------------------------------------------------------------------------------------------------------------------------------------------------------------------------|------------------------|
|   |       |         |                                                                                |                                                          |                  |                                                     |       | endogenous<br>Bornavirus-like<br>nucleoprotein 1<br>[Mus caroli]                                                                                                                                                                                                        | 0.092                  |
|   |       |         |                                                                                |                                                          |                  |                                                     |       | hypothetical<br>protein<br>B5V03_18725<br>[Bradyrhizobium<br>betae]                                                                                                                                                                                                     | 0.51                   |
| N | 41    | 161-175 | QIKKRFKTMMAALNR                                                                | transplant                                               | 1                | endogenous<br>Bornavirus like<br>nucleoprotein 2    | 0.28  | endogenous<br>Bornavirus-like<br>nucleoprotein 2<br>[Ictidomys<br>tridecemlineatus]                                                                                                                                                                                     | 0.05                   |
| N | 47-48 | 185-203 | LQMENPHEAIDWINGQPWV                                                            | blood donor<br>neg ctrl<br>(BoDV-1)                      | 1<br>1<br>(3)    | endogenous<br>Bornavirus like<br>nucleoprotein 1    | 0.006 | endogenous<br>Bornavirus-like<br>nucleoprotein 2<br>[Ictidomys<br>tridecemlineatus]                                                                                                                                                                                     | 2E-06                  |
| N | 68-82 | 269-339 | SAKLKEDHADLPFLGAIRHPDAIKLAP<br>RSFPNLASAAFYWSKKENPTMAGYR<br>ASTIQPGASVKETQLARY | transplant<br>blood donor<br>blood donor NEG<br>(BoDV-1) | 5<br>2<br>2<br>3 | endogenous<br>Bornavirus like<br>nucleoprotein 1    | 2E-05 | endogenous<br>Bornavirus-like<br>nucleoprotein 2<br>[Ictidomys<br>tridecemlineatus]<br><br>endogenous<br>Bornavirus-like<br>nucleoprotein 1-<br>like [Chrysochloris<br>asiatica]<br><br>endogenous<br>Bornavirus-like<br>nucleoprotein 1 of<br>several other<br>species | 5E-48<br><br><br>6E-21 |
| X | 1     | 1-15    | MSSDLRLTLLELVRR                                                                | transplant                                               | 1                | coiled-coil<br>domain-<br>containing<br>protein 157 | 0.57  | hypothetical<br>protein<br>C5Q97_08165<br>[Victivallales<br>bacterium]                                                                                                                                                                                                  | 3.2                    |
| X | 4     | 13-27   | VRRLNGNATIESGRL                                                                | blood donor                                              | 1                | NFIL3 like<br>protein                               | 3.2   | AsmA-like C-<br>terminal domain-<br>containing protein                                                                                                                                                                                                                  | 0.28                   |

|   |       |       |                                     |                                                          |                    |                                                                         |                              |                                                                                                                                                                                                                                                                                                                                                                 |                                                       |
|---|-------|-------|-------------------------------------|----------------------------------------------------------|--------------------|-------------------------------------------------------------------------|------------------------------|-----------------------------------------------------------------------------------------------------------------------------------------------------------------------------------------------------------------------------------------------------------------------------------------------------------------------------------------------------------------|-------------------------------------------------------|
|   |       |       |                                     |                                                          |                    |                                                                         |                              | [Deltaproteobacteria bacterium]                                                                                                                                                                                                                                                                                                                                 |                                                       |
| X | 5-7   | 17-35 | NGNATIESGRLPGGRRRSPDTT              | transplant<br>blood donor<br>(BoDV-1)                    | 1<br>1<br>2        | gamma-taxilin                                                           | 0.47                         | ABC transporter<br>[Aeromicrobium<br>sp.]                                                                                                                                                                                                                                                                                                                       | 2.0                                                   |
| X | 15-19 | 57-87 | PTSRPAPEGPQEEPLHLRPRPANRK<br>GAAVE  | transplant<br>blood donor<br>(BoDV-1)                    | 4<br>2<br>(8)      | germinal-center<br>associated<br>nuclear protein                        | 1.1                          | hypothetical<br>protein<br>[Methylobacterium<br>sp.]                                                                                                                                                                                                                                                                                                            | 0.99                                                  |
| P | 1-5   | 1-31  | MATRPSSLVDSLEDEEDPQTLRRERP<br>GSPRP | transplant<br>blood donor<br>blood donor NEG<br>(BoDV-1) | 3<br>1<br>1<br>(6) | PDCD7 protein<br><br>CDK5 and ABL1<br>enzyme<br>substrate<br><br>CABLES | 0.40<br><br>0.79<br><br>0.79 | unnamed protein<br>product [Mytilus<br>coruscus]<br><br>hypothetical<br>protein<br>[Azospirillum<br>ramasamyi]<br><br>Rab-GTPase-TBC<br>domain<br>[Phytophthora<br>infestans]<br><br>neurotrophin<br>receptor-<br>interacting factor<br>homolog<br>[Chrysochloris<br>asiatica]<br><br>tbc1 domain family<br>member 23-like<br>partial [Plasmopara<br>halstedii] | 0.067<br><br>0.19<br><br>0.26<br><br>0.72<br><br>0.72 |
| P | 9     | 33-47 | KVPRNALTQPVDQLL                     | transplant<br>blood donor<br>blood donor NEG<br>(BoDV-1) | 1<br>1<br>1<br>(4) | protein sprouty<br>homolog 2                                            | 9.2                          | malto-<br>oligosyltrehalose<br>synthase<br>[Proteobacteria<br>bacterium]                                                                                                                                                                                                                                                                                        | 6.3                                                   |
| P | 11-13 | 41-63 | QPVDQLLKDLRKNPSMISDPDQR             | transplant<br>blood donor<br>(BoDV-1)                    | 3<br>1<br>(6)      | MLF1IP protein                                                          | 0.91                         | methyltransferase<br>[Pontibacter<br>korlensis]                                                                                                                                                                                                                                                                                                                 | 0.71                                                  |

|   |       |         |                                                   |                                                          |                    |                              |     |                                                                           |       |
|---|-------|---------|---------------------------------------------------|----------------------------------------------------------|--------------------|------------------------------|-----|---------------------------------------------------------------------------|-------|
| P | 16-17 | 61-79   | DQRTGREQLSNDELIKKLV                               | transplant<br>blood donor NEG<br>neg ctrl<br>(BoDV-1)    | 3<br>1<br>3<br>(4) | la-related<br>protein 6      | 1.5 | golgin subfamily B<br>member 1 [Mugil<br>cephalus]                        | 0.78  |
| P | 19    | 73-87   | ELIKKLVTELAENSM                                   | transplant<br>blood donor<br>(BoDV-1)                    | 1<br>1<br>(1)      | zinc finger<br>protein 469   | 6.5 | sugar ABC<br>transporter ATP-<br>binding protein<br>[Subtercola sp.]      | 6.3   |
| P | 23-24 | 89-107  | EAEVVRGTLGDISARIEAG                               | transplant<br>(BoDV-1)                                   | 4<br>(2)           | cytochrome<br>P450 4X1       | 4.3 | precorrin-4 C(11)-<br>methyltransferase<br>[Planctomycetota<br>bacterium] | 0.39  |
|   |       |         |                                                   |                                                          |                    |                              |     | precorrin-4 C(11)-<br>methyltransferase<br>[Moorella sp.]                 | 0.78  |
| P | 29-37 | 113-159 | ALQVETIQTAQRCDHSDSIRILGENIKI<br>LDRSMKTMMEKLMMEKV | transplant<br>blood donor<br>blood donor NEG<br>neg ctrl | 5<br>1<br>2<br>1   | alternative<br>protein RBM28 | 2.7 | hypothetical<br>protein 3 [Bitis<br>gabonica]                             | 0.002 |
|   |       |         |                                                   |                                                          |                    |                              |     | TPA: MMPL family<br>transporter<br>[Acholeplasmatace<br>ae bacterium]     | 0.21  |
|   |       |         |                                                   |                                                          |                    |                              |     | TPA: GTPase HflX<br>[candidate division<br>Zixibacteria<br>bacterium]     | 0.55  |
|   |       |         |                                                   |                                                          |                    |                              |     | TPA: anion<br>permease<br>[Elusimicrobia<br>bacterium]                    | 0.75  |
|   |       |         |                                                   |                                                          |                    |                              |     | MMPL family<br>transporter<br>[Acholeplasmatace<br>ae bacterium]          | 0.77  |
|   |       |         |                                                   |                                                          |                    |                              |     | hypothetical<br>protein<br>[Cryomorpha<br>ignava]                         | 0.98  |

|   |    |         |                 |                         |          |                                                  |      |                                                                                                                                                                                        |                             |
|---|----|---------|-----------------|-------------------------|----------|--------------------------------------------------|------|----------------------------------------------------------------------------------------------------------------------------------------------------------------------------------------|-----------------------------|
| P | 43 | 169-183 | GTSAPMLPSHPAPPR | transplant<br>(BoDV-1)  | 1<br>(3) | alternative<br>protein KLC2                      | 0.4  | unnamed protein<br>product [Taenia<br>asiatica]<br><br>hypothetical<br>protein<br>F4802DRAFT_2757<br>47 [Xylaria<br>palmicola]<br><br>Os09g0532600<br>[Oryza sativa<br>Japonica Group] | 0.56<br><br>0.79<br><br>0.8 |
| P | 48 | 189-203 | QLPSAPTTDEWDIIP | blood donor<br>(BoDV-1) | 1<br>(4) | immunoglobulin<br>heavy chain<br>junction region | 0.29 | carboxypeptidase<br>regulatory-like<br>domain-containing<br>protein<br>[Deltaproteobacter<br>ia bacterium]                                                                             | 6.3                         |

Peptides that were identified in a linear epitope mapping to be associated with false-reactive ELISA results were blasted against a human protein database and an organism-independent database (after exclusion of *Bornaviridae*), respectively (<https://blast.ncbi.nlm.nih.gov>). All results with E values < 1 are given. For peptides with insignificant alignments (E value > 1), the lowest E value is shown.
